# Supplementary material for: AAV-mediated delivery of osteoblast/osteoclast-regulating miRNAs for osteoporosis therapy
Source: PubMed Central journal article supplement — Mol Ther Nucleic Acids. 2022 Jul 11;29:296–311. doi: 10.1016/j.omtn.2022.07.008 (PMC9352805; doi:10.1016/j.omtn.2022.07.008), 2022-07-11
Supplement: mmc1.pdf [file mmc1.pdf]

OMTN, Volume 29

## **Supplemental information**

### **AAV-mediated delivery of osteoblast/osteoclast-regulating miRNAs for osteoporosis therapy**

**Aijaz Ahmad John, Jun Xie, Yeon-Suk Yang, Jung-Min Kim, Chujiao Lin, Hong Ma, Guangping Gao, and Jae-Hyuck Shim**

**A**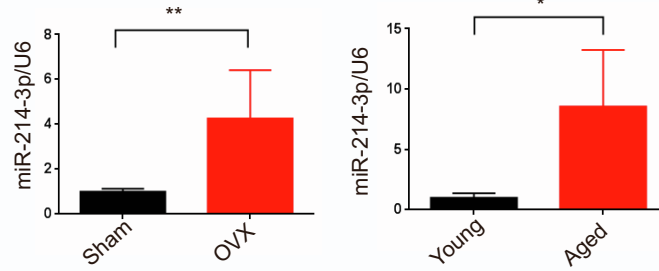**B**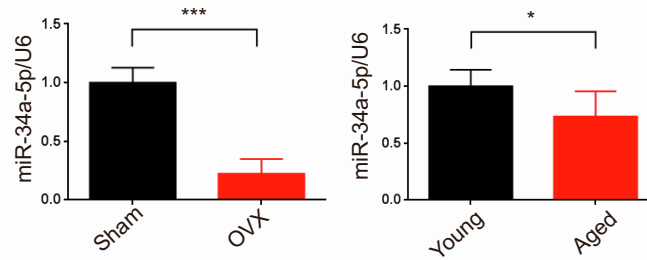

**Supplementary Figure 1. Expression of miR-214-3p and miR-34a-5p in osteoporotic bones.**

Expression of miR-214-3p (A) or miR-34a-5p (B) in the tibia of 16-week-old female mice with Sham or OVX surgery or 2.5-month-old (young) or 24-month-old (aged) male mice was assessed by RT-qPCR. Values represent mean  $\pm$  SD: \* $P < 0.05$ ; \*\* $P < 0.01$ ; and \*\*\* $P < 0.001$  by an unpaired two-tailed Student's t-test.

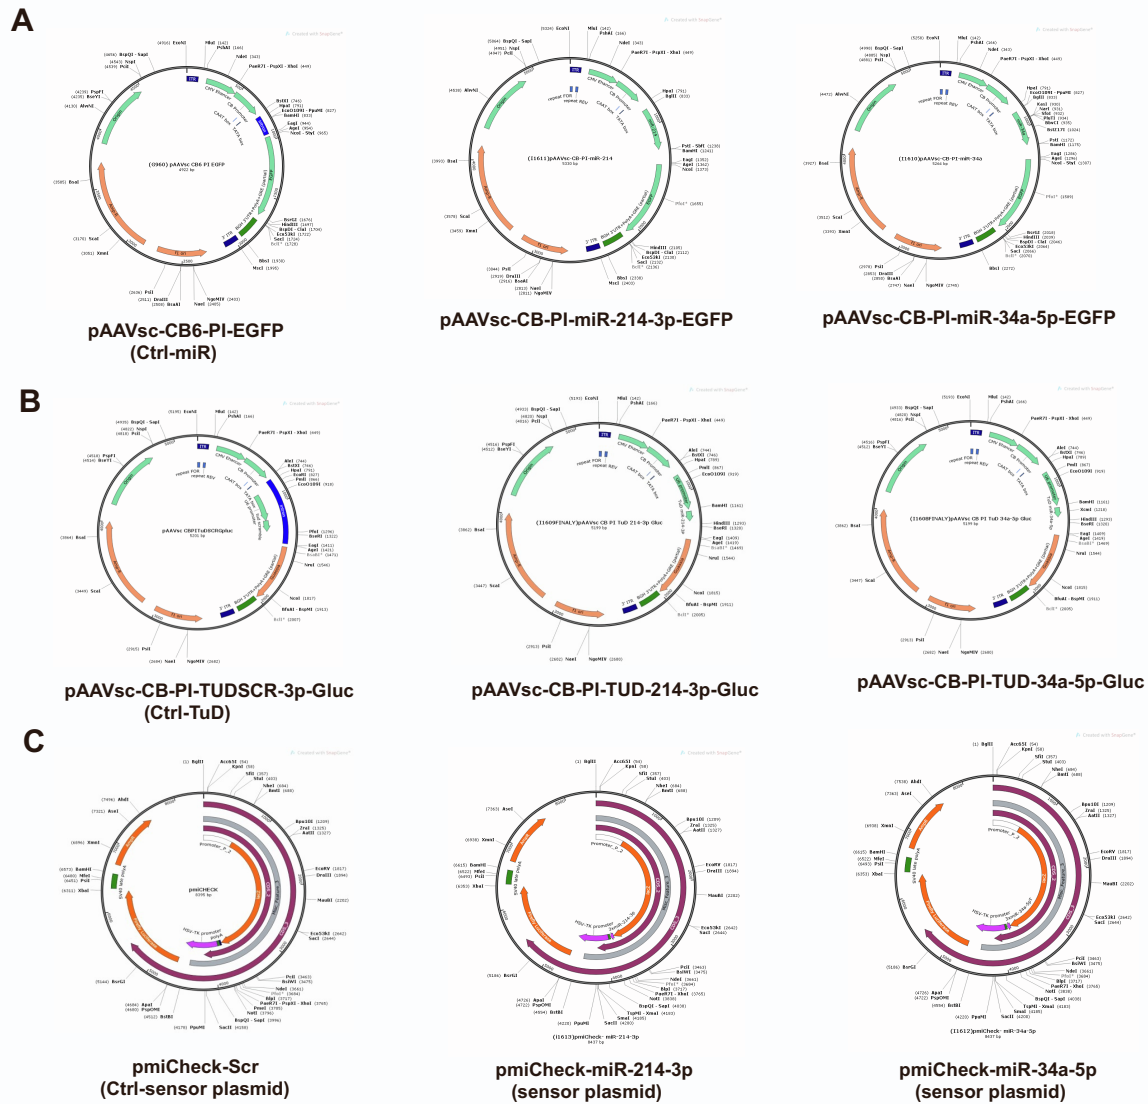

**Supplementary Figure 2. Construction of AAV vector genomes and sensor plasmids.**

(A) AAV vector genomes containing CBA (CMV enhancer/chicken  $\beta$ -actin) promoter, miRNA (miR-214-3p or miR-34a-5p), and the EGFP gene. (B) AAV vector genomes containing CBA promoter, tough decoy (miR-214-3p TuD or miR-34a-5p TuD), and the *Guassia* luciferase (gLuc) gene. (C) Sensor plasmids containing the complementary sequences of miR-214-3p or miR-34a-5p in the 3'-UTR of Lac Z ( $\beta$ -galactosidase) reporter gene.

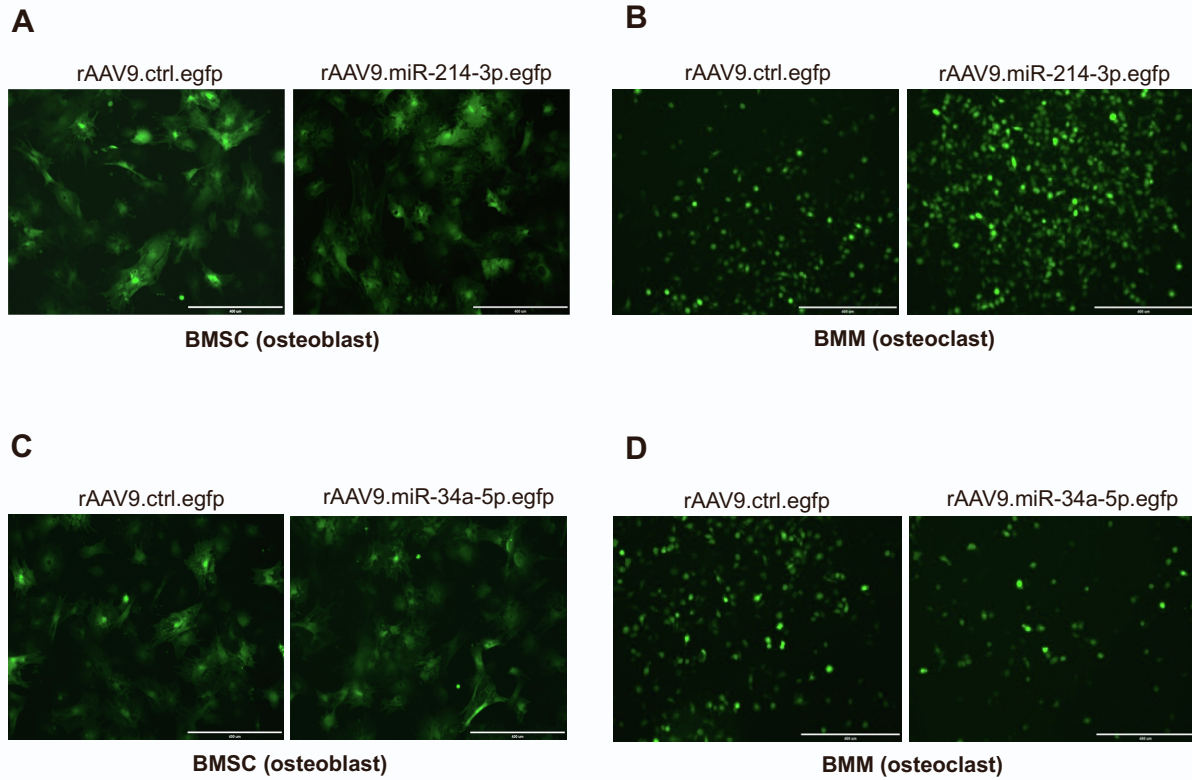

**Supplementary Figure 3. *In vitro* transduction efficiency of rAAV9 vectors in the osteoblast and osteoclast.**

(A, C) Mouse bone marrow-derived stromal cells (BMSCs) were incubated with rAAV9.egfp carrying ctrl, miR-214-3p or miR-34a-5p for two days and transduction efficiency was assessed by EGFP expression using fluorescence microscopy. (B, D) Two days after treatment with M-CSF and RANKL, mouse bone marrow-derived monocytes (BMMs) were incubated with rAAV9.egfp carrying ctrl, miR-214-3p or miR-34a-5p for two days and transduction efficiency was assessed by EGFP expression using fluorescence microscopy. Scale bars: 400  $\mu$ m.

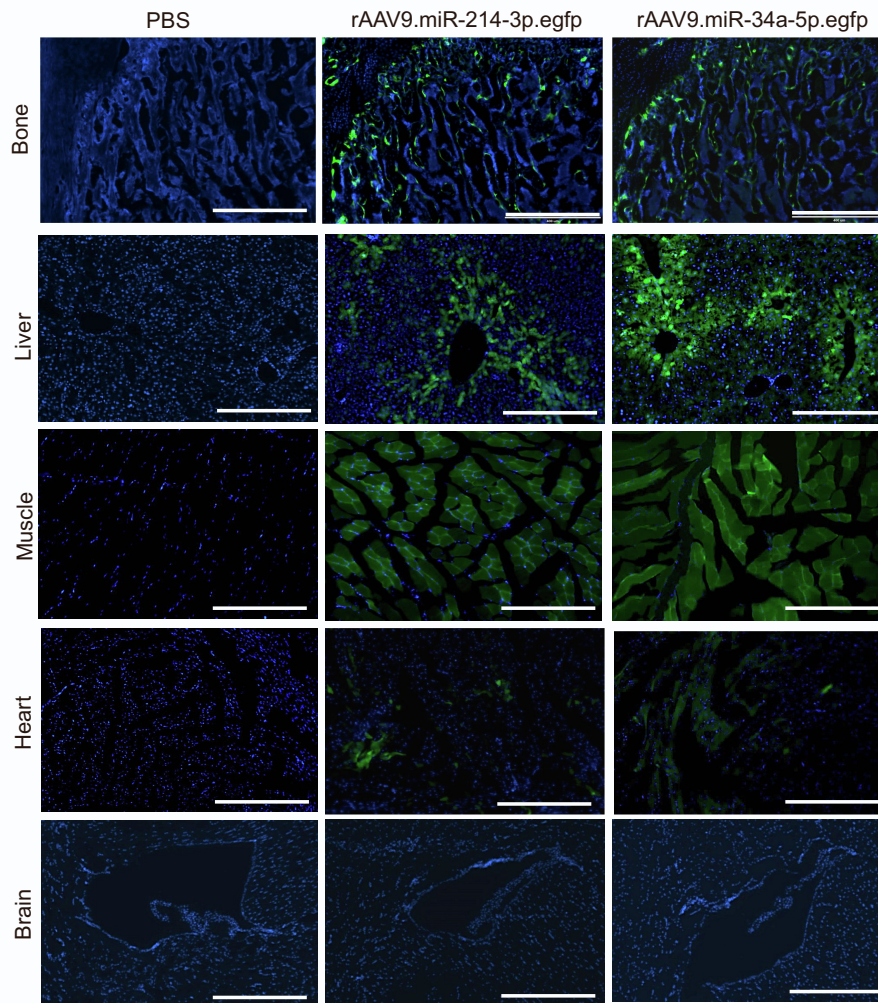

**Supplementary 4. Tissue distribution of systemically delivered rAAV9 vectors in mice.**

Two-month-old healthy mice were i.v. injected with a single dose of PBS or rAAV9 ( $5 \times 10^{13}$  kg/vg) carrying ctrl, miR-214-3p, or miR-34a-5p, and two weeks later, EGFP expression in individual tissues was assessed by fluorescence microscopy. Scale bars: 400  $\mu$ m.

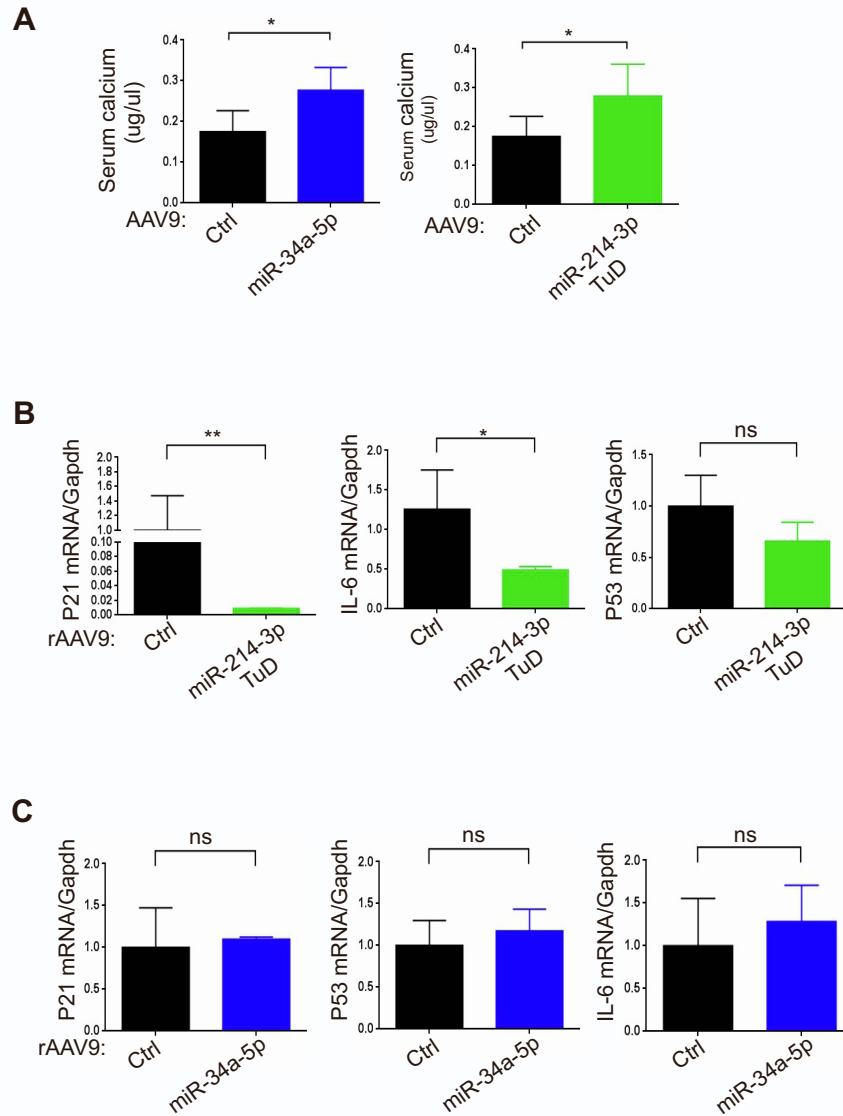

**Supplementary Figure 5. Effects of AAV9 vectors carrying miR-214-3p TuD or miR-34a-5p on serum calcium levels and bone senescence in aged mice.**

24-month-old male mice (n = 5) were i.v. injected with a single dose of rAAV9 ( $5 \times 10^{13}$  kg/vg) carrying ctrl or miR-214-3p TuD or miR-34a-5p, and eight weeks later, calcium levels in the serum were measured by calorimetric assay (A). mRNA levels of cell senescence marker genes, including p21, p53, and IL-6, were assessed by RT-PCR analysis and normalized to Gapdh (B, C). Values represent mean  $\pm$  SD: \*P < 0.05; \*\*P < 0.01; and ns, not significant by an unpaired two-tailed Student's t-test.

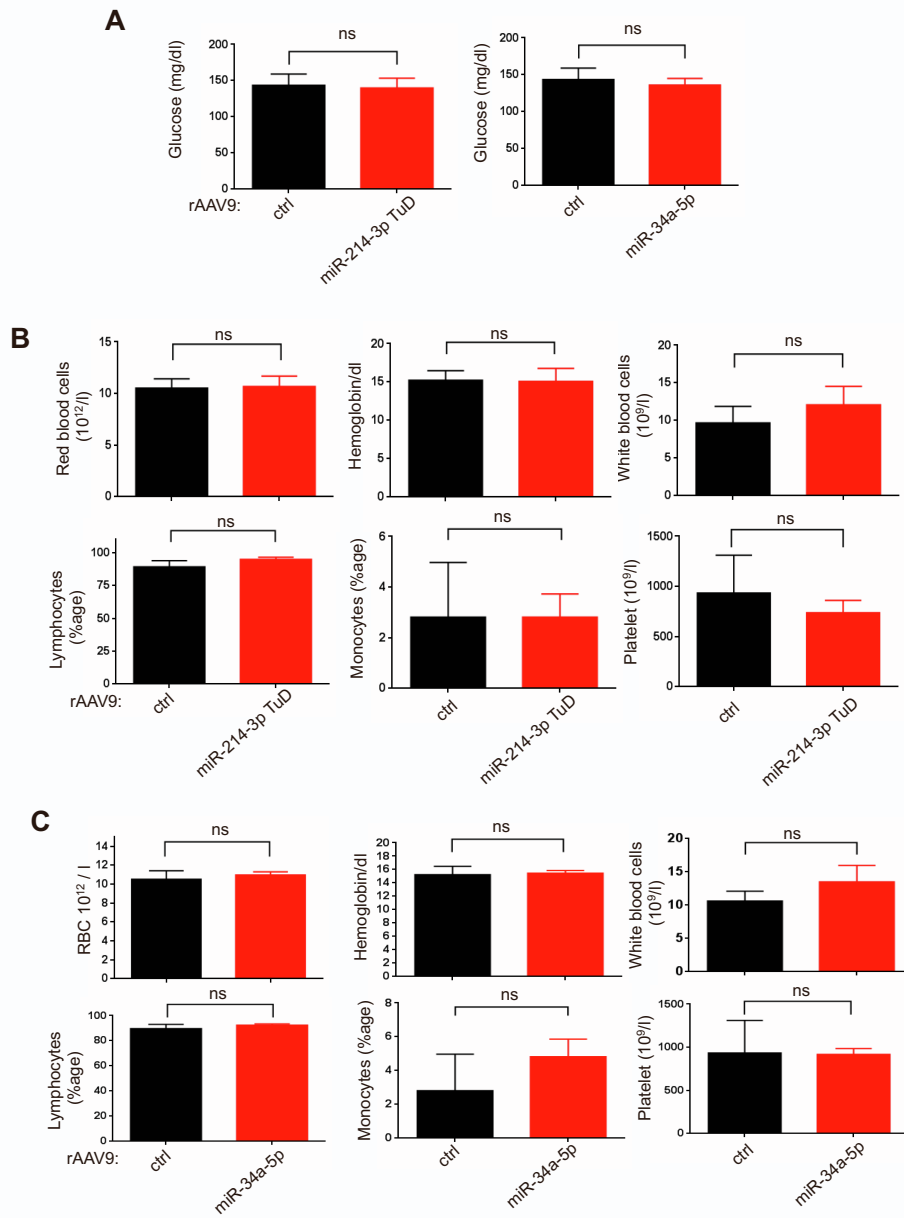

**Supplementary Figure 6. Effects of AAV9 vectors carrying miR-214-3p TuD or miR-34a-5p in healthy mice.**

Ten-week-old healthy mice were i.v. injected with a single dose of rAAV9 ( $5 \times 10^{13}$  kg/vg) carrying ctrl, miR-214-3p TuD, or miR-34a-5p and eight weeks later, tests for blood glucose levels (A) and complete blood count (CBC) (B, C) were performed in AAV-treated mice ( $n = 5$ ). Values represent mean  $\pm$  SD: ns, not significant by an unpaired two-tailed Student's t-test.

**Supplementary Table 1. Mouse primer sequences for RT-PCR**

| <b>Name</b> | <b>Forward Primer</b>     | <b>Reverse Primer</b>    |
|-------------|---------------------------|--------------------------|
| Runx2       | TACAAACCATACCCAGTCCCTGTTT | AGTGCTCTAACCACAGTCCATGCA |
| Ibsp (Bsp)  | CAGGGAGGCAGTGACTCTTC      | AGTGTGGAAAGTGTGGCGTT     |
| Sp7 (Osx)   | ATGGCGTCCTCTCTGCTTGA      | GAAGGGTGGGTAGTCATTTG     |
| Bglap (Ocn) | GCAGCACAGGTCCTAAATAG      | GGGCAATAAGGTAGTGAACAG    |
| Pten        | AATTCCCAGTCAGAGGCGCTATGT  | GATTGCAAGTTCCGCCACTGAACA |
| Notch1      | AACAGTGCCGAATGTGAGTGG     | AAGTGACGCAAGAGCACCTAG    |
| Atf4        | ATGATGGCTTGGCCAGTG        | CCATTTTCTCCAACATCCAATC   |
| Tgif2       | CCTCTCGGTGCTGCAGATA       | TAGGGTCTTTGCCATCCTTC     |
| Ctsk        | AGCAGAACGGAGGCATTGACTC    | CCCTCTGCATTTAGCTGCCTTTG  |
| Acp5        | GCGACCATTGTTAGCCACATACG   | CGTTGATGTCGCACAGAGGGAT   |
| RANK        | TGGGTGATTTTCTTTTGGTGGG    | CCAAGAACCAGTGCTCGTGA     |
| Gapdh       | ACTGAGCAAGAGAGGCCCTA      | TATGGGGGTCTGGGATGGAA     |
| Hprt        | CTGGTGAAAAGGACCTCTCGAAG   | CCAGTTTCACTAATGACACAAACG |



**Supplementary Table 2. Oligonucleotides and gBlocks used in this study**

| Oligonucleotides           | Sequence(5'to3')                                                                                                                                                                                                                                                                                                                                                                                                                                                                                      | Aims                                                      |
|----------------------------|-------------------------------------------------------------------------------------------------------------------------------------------------------------------------------------------------------------------------------------------------------------------------------------------------------------------------------------------------------------------------------------------------------------------------------------------------------------------------------------------------------|-----------------------------------------------------------|
| TuD34a-5p F                | CATCAACACAACCAGCTAAGTCGGACACTGCCACAAG<br>TATTCTGGTCACAGAATACAACAACCAGCTAAGTCG<br>GACACTGCCACAAG                                                                                                                                                                                                                                                                                                                                                                                                       | To generate<br>TuD34a-5p<br>for miR-34a-<br>5p inhibition |
| TuD34a-5p R                | TCATCTTGTGGCAGTGTCCGACTTAGCTGGTTGTGTTG<br>TATTCTGTGACCAGAATACTTGTGGCAGTGTCCGACTT<br>AGCTGGTTGTGTT                                                                                                                                                                                                                                                                                                                                                                                                     |                                                           |
| TuDmiR-214-3P F            | CATCAACACTGCCTGTCTGGTCGTGCCTGCTGTCAAGT<br>ATTCTGGTCACAGAATACAACAAGCTGCCTGTCTGGTCGT<br>GCCTGCTGTCAAG                                                                                                                                                                                                                                                                                                                                                                                                   | To generate<br>TuD214-3p<br>for miR-214-<br>3p inhibition |
| TuDmiR-214-3P R            | TCATCTTGACAGCAGGCACGACCAGACAGGCAGTGTT<br>GTATTCTGTGACCAGAATACTTGACAGCAGGCACGAC<br>CAGACAGGCAGTGTT                                                                                                                                                                                                                                                                                                                                                                                                     |                                                           |
| 3xmiR-34a-5pT<br>sense     | TCGAGACAACCAGCTAAGACACTGCCAACAACCAGCT<br>AAGACACTGCCAACAACCAGCTAAGACACTGCCAGC                                                                                                                                                                                                                                                                                                                                                                                                                         | To generate<br>miR-34a-5p<br>targeting sites              |
| 3xmiR-34a-5pT<br>antisense | GGCCGCTGGCAGTGTCTTAGCTGGTTGTTGGCAGTGT<br>CTTAGCTGGTTGTTGGCAGTGTCTTAGCTGGTTGTC                                                                                                                                                                                                                                                                                                                                                                                                                         |                                                           |
| 3xmiR-214-3p<br>sense      | TCGAGACTGCCTGTCTGTGCCTGCTGTACTGCCTGTCT<br>GTGCCTGCTGTACTGCCTGTCTGTGCCTGCTGTGC                                                                                                                                                                                                                                                                                                                                                                                                                         | To generate<br>miR-214-3p<br>targeting sites              |
| 3xmiR-214-3p<br>antisense  | GGCCGCACAGCAGGCACAGACAGGCAGTACAGCAGG<br>CACAGACAGGCAGTACAGCAGGCACAGACAGGCAGTC                                                                                                                                                                                                                                                                                                                                                                                                                         |                                                           |
| miR-34a gBlock             | GTCTTTTATTTTCAGGTCCCAGATCTTGGCTTCCAAGTG<br>CTGGAGGAGTGTGTCATACCTCGGTAGGGTCCACTAC<br>ACATCTTTCTCCCGCAGCCTCTCCATCTTCCTGTGACT<br>GCGGGCGCCTCAGCCTGGGCTGGCCAGCTGTGAGTA<br>ATTCTTTGGCAGTGTCTTAGCTGGTTGTTGTGAGTATT<br>AGCTAAGGAAGCAATCAGCAAGTATACTGCCCTAGAA<br>GTGCTGCACATTGTTGGGCCGAGAAGGAAAAGGTCAG<br>AGGTCAGCAACGCCACACCCCTGAGAGGCGCTGGA<br>CTTGCGGAGCTGCTCGACCATACTGGTGGGTATGGGA<br>TGCTGGGGAGGCTGGTGTACTGCAGGGGATCCGGT<br>GGTGGTGC                                                                     | To express<br>miR-34a-5p                                  |
| miR-214 gBlock             | GTCTTTTATTTTCAGGTCCCAGATCTTTAGTTCCATAATG<br>TTTTAATGTTTAATTCTATTGTGTGTTTCTCTCTTTCCC<br>TTTATCCCCCTGTCTTCCCCCTAAATCACCAAATCT<br>GGAAAACAGGCTGATTGTATCTGTCCCTGAGCAAAGG<br>AAACCTGAAGACCCAAGGGCCTGGCTGGACAGAGTT<br>GTCATGTGTCTGCCTGTCTACACTTGCTGTGCAGAACA<br>TCCGCTCACCTGTACAGCAGGCACAGACAGGCAGTCA<br>CATGACAACCCAGCCTGAATGACCACCAGCCATTGAA<br>AGAAAGCTGCCCTCACAACATAGCATCTACACCAAGAG<br>CTACAACCACAGTGAGGGGGTTGGGGGGCCTGGGGT<br>TTGAAACTGTTGGCTTATTAAGAAAAGAACTCGTATGTA<br>ATCCCTGCAGGGGATCCGGTGGTGGTGC | To express<br>miR-214-3p                                  |
